# Supplementary material
Source: Springer Nature journal article supplement (https://www.springermedizin.de/resource/supplementary/12890_2010_269_MOESM23_ESM.pdf/9504838)

REF SEX

Relative Risk  
95% CIWeight  
(%)Relative Risk  
95% CI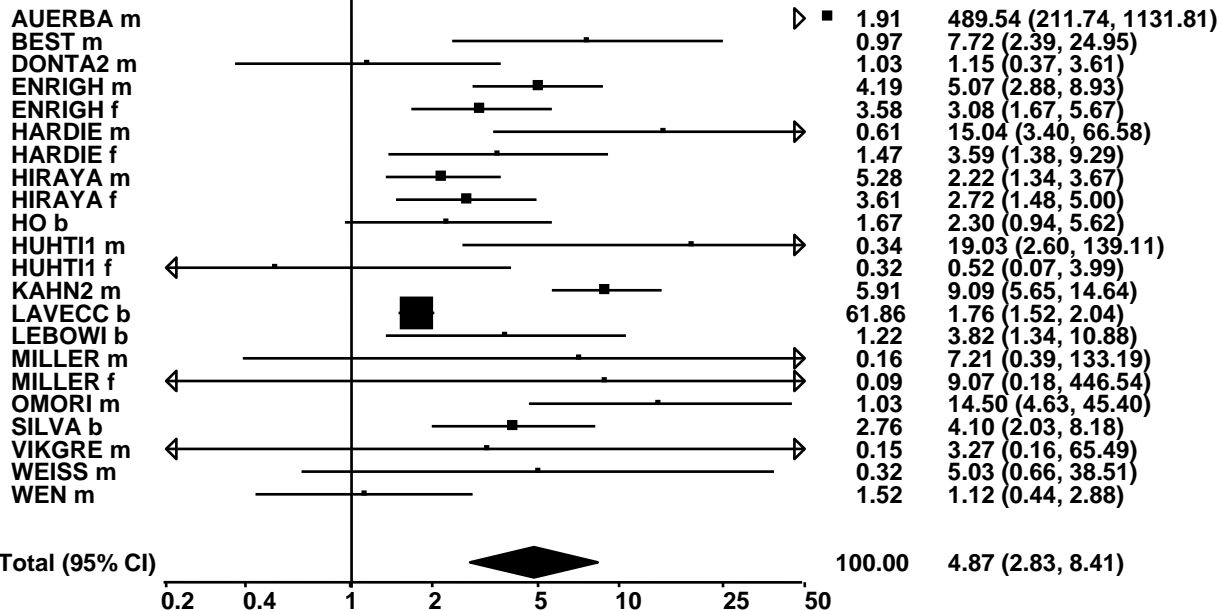

Supplement: MOESM23 [file 9504838]
